# Supplementary material for: O-GlcNAcylation of MITF regulates its activity and CDK4/6 inhibitor resistance in breast cancer
Source: PubMed Central journal article supplement (PMC10602086; doi:10.21203/rs.3.rs-3377962/v1), 2023-10-03
Supplement: NIHPPrs3377962v1-supplement-1.pdf [file NIHPPrs3377962v1-supplement-1.pdf]

## Supplementary Files

This is a list of supplementary files associated with this preprint. Click to download.

- [SupplementaryTable1.xlsx](#)
- [SupplementaryTable2.xlsx](#)
- [SupplementaryTable3.xlsx](#)
- [Supplmentaldata.docx](#)
